# Supplementary material for: An imine linked fluorescent covalent organic cage: the sensing of chloroform vapour and metal ions, and the detection of nitroaromatics
Source: Royal Society of Chemistry journal article supplement (doi:10.1039/d1nj00434d), 2021-01-01
Supplement: d1nj00434d1.pdf [file d1nj00434d1.pdf]

## Supporting information.

# Imine linked fluorescent covalent organic cage: sensing of chloroform vapour, metal ions and detection of nitroaromatics.

Ramesh Kumar Gajula,<sup>a</sup> Subhrajit Mohanty,<sup>a</sup>, Manjari Chakraborty,<sup>b</sup> Moley Sarkar<sup>b</sup> and M. Jaya Prakash.<sup>\*a</sup>

<sup>a</sup>Department of Chemistry, National Institute of Technology Rourkela, Rourkela-769008, Odisha, India. Telephone: +91-6612462668. \*maddaj@nitrkl.ac.in, ORCID: orcid.org/0000-0001-5334-725X

<sup>b</sup>School of Chemical Sciences, National Institute of Science Education and Research, Bhubaneswar, HBNI, Bhipur-Padanpur, Jatni, Khurda-752050, Odisha, India.

## List of contents.

**Fig. S1:** FT-IR spectrum of F-COC cage.

**Fig. S2:**  $^1\text{H}$  NMR spectrum of F-COC cage recorded in  $\text{CDCl}_3$ .

**Fig. S3:**  $^{13}\text{C}$  NMR spectrum of F-COC cage recorded in  $\text{CDCl}_3$ .

**Fig. S4:**  $^1\text{H}$  NMR spectrum of F-COC cage (Recrystallized sample) recorded in  $\text{CDCl}_3$ .

**Fig. S5:**  $^{13}\text{C}$  NMR spectrum of F-COC cage (Recrystallized sample) recorded in  $\text{CDCl}_3$ .

**Fig. S6:** ESI-MS spectrum of F-COC cage.

**Fig. S7:** Hydrogen bond lengths observed in the optimized geometries of the F-COC with solvent molecules. (a)  $\text{CHCl}_3$  (b) DCM (c) THF (d) MeOH.

**Fig. S8:** (a) Lippert-Mataga plot of F-COC with different solvents without Methanol (b) F-COC with methanol.

**Fig. S9:** Fluorescence emission spectrum of solid F-COC and PS polymer matrix with cage.

**Fig. S10:** Experimental setup for the chloroform sensor experiment.

**Fig. S11:** Fluorescence emission spectra of F-COC cage in  $\text{CHCl}_3$  and DCM solvent mixture in various ratios.

**Fig. S12:** Stern–Volmer plot  $I_0/I$  versus  $[\text{PA}]$  in DMSO.

**Fig. S13:** Fluorescence emission of F-COC with different nitro analytes.

**Fig. S14:**  $^1\text{H}$  NMR spectra of cage before and after addition of PA recorded in  $\text{CDCl}_3$ .

**Fig. S15:** Hydrogen bonding interactions observed in the optimized geometries of the F-COC with PA.

**Fig. S16:** Fluorescence quenching of F-COC with mixture of picric acid and 2,4-DNP in various ratios in DMSO solution.

**Fig. S17:** F-COC cage with different metal ions viewing in normal visible light (Top). (b) Under UV light at 365 nm (down).

**Fig. S18:** PL-Images of (a)  $\text{Zn}^{+2}$  - F-COC (b)  $\text{Cd}^{+2}$  - F-COC (c)  $\text{Pb}^{+2}$  - F-COC

**Fig. S19:** Coordination mode of F-COC with metal ions.

**Fig. S20:** Digital photograph of the solid F-COC under (a) normal light and (b) UV light at 365 nm.

**Fig. S21:** PL emission spectra of F-COC with  $\text{Zn}^{+2}$  and  $\text{Cu}^{+2}$  metal ions in various ratios in solid state.

**Table. S1:** Single crystal data information of F-COC crystal.

**Table. S2:** Observed and calculated absorption maximum of F-COC.

**Table. S2:** Spectral data of F-COC in various solvents.

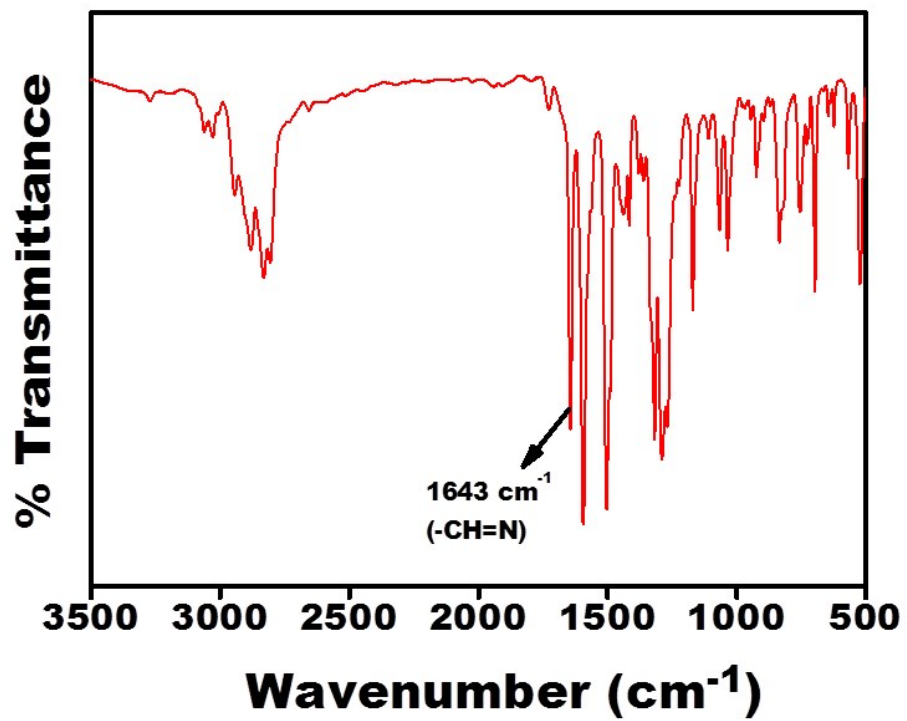

Fig. S1: FT-IR spectrum of F-COC.

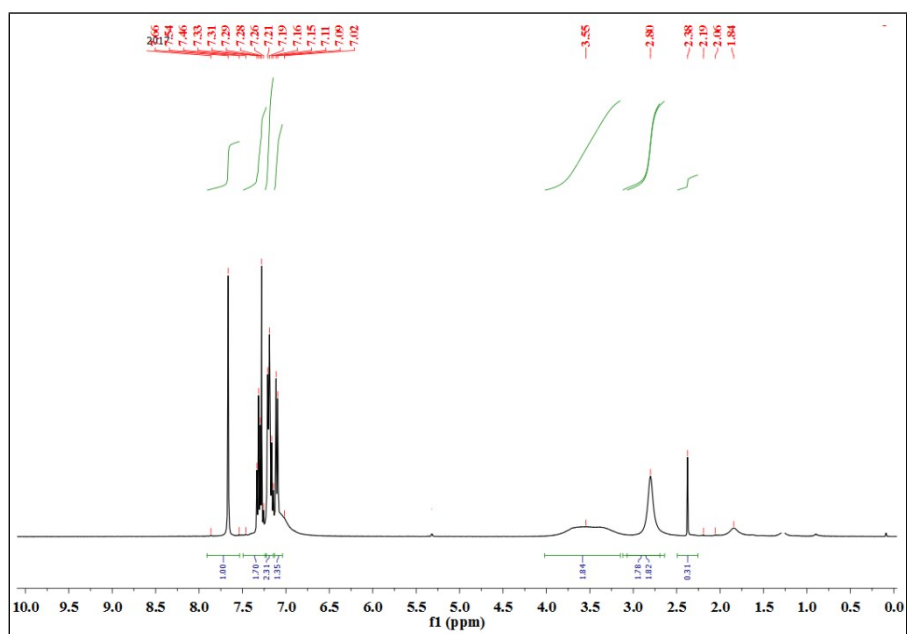

**Fig. S2:**  $^1\text{H}$  NMR spectrum of F-COC cage (as synthesized) recorded in  $\text{CDCl}_3$ .

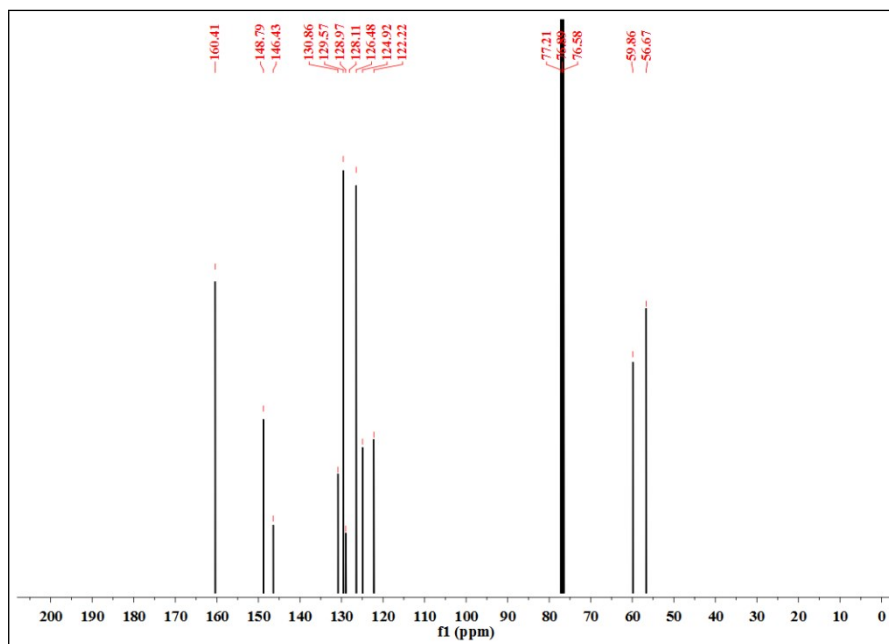

**Fig. S3:**  $^{13}\text{C}$  NMR spectrum of F-COC cage (as synthesized) recorded in  $\text{CDCl}_3$ .



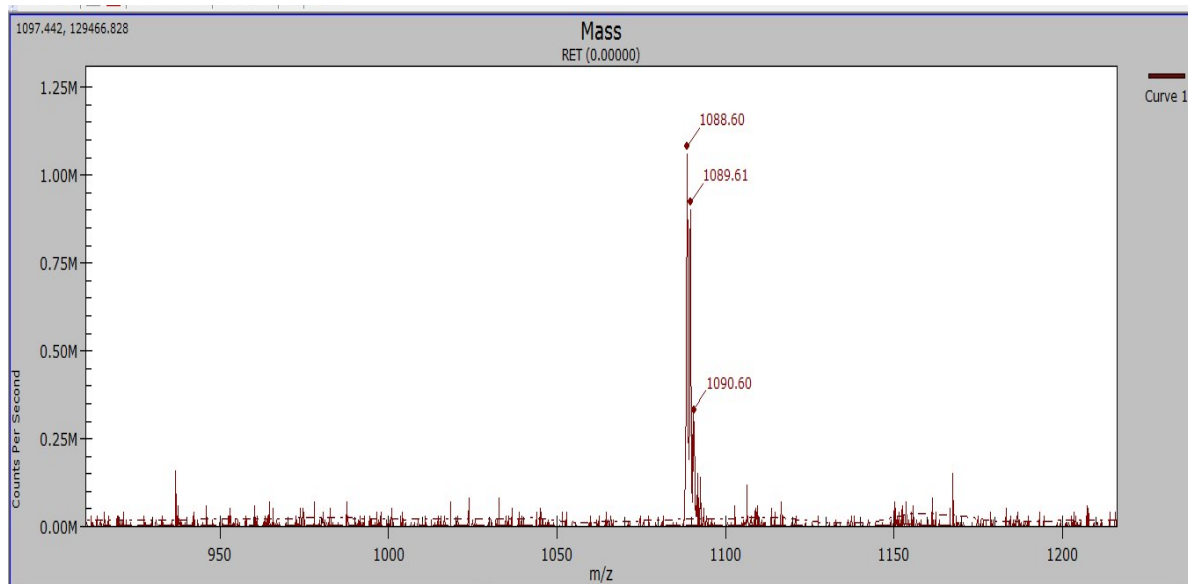

**Fig. S6:** ESI-MS spectrum of F-COC.

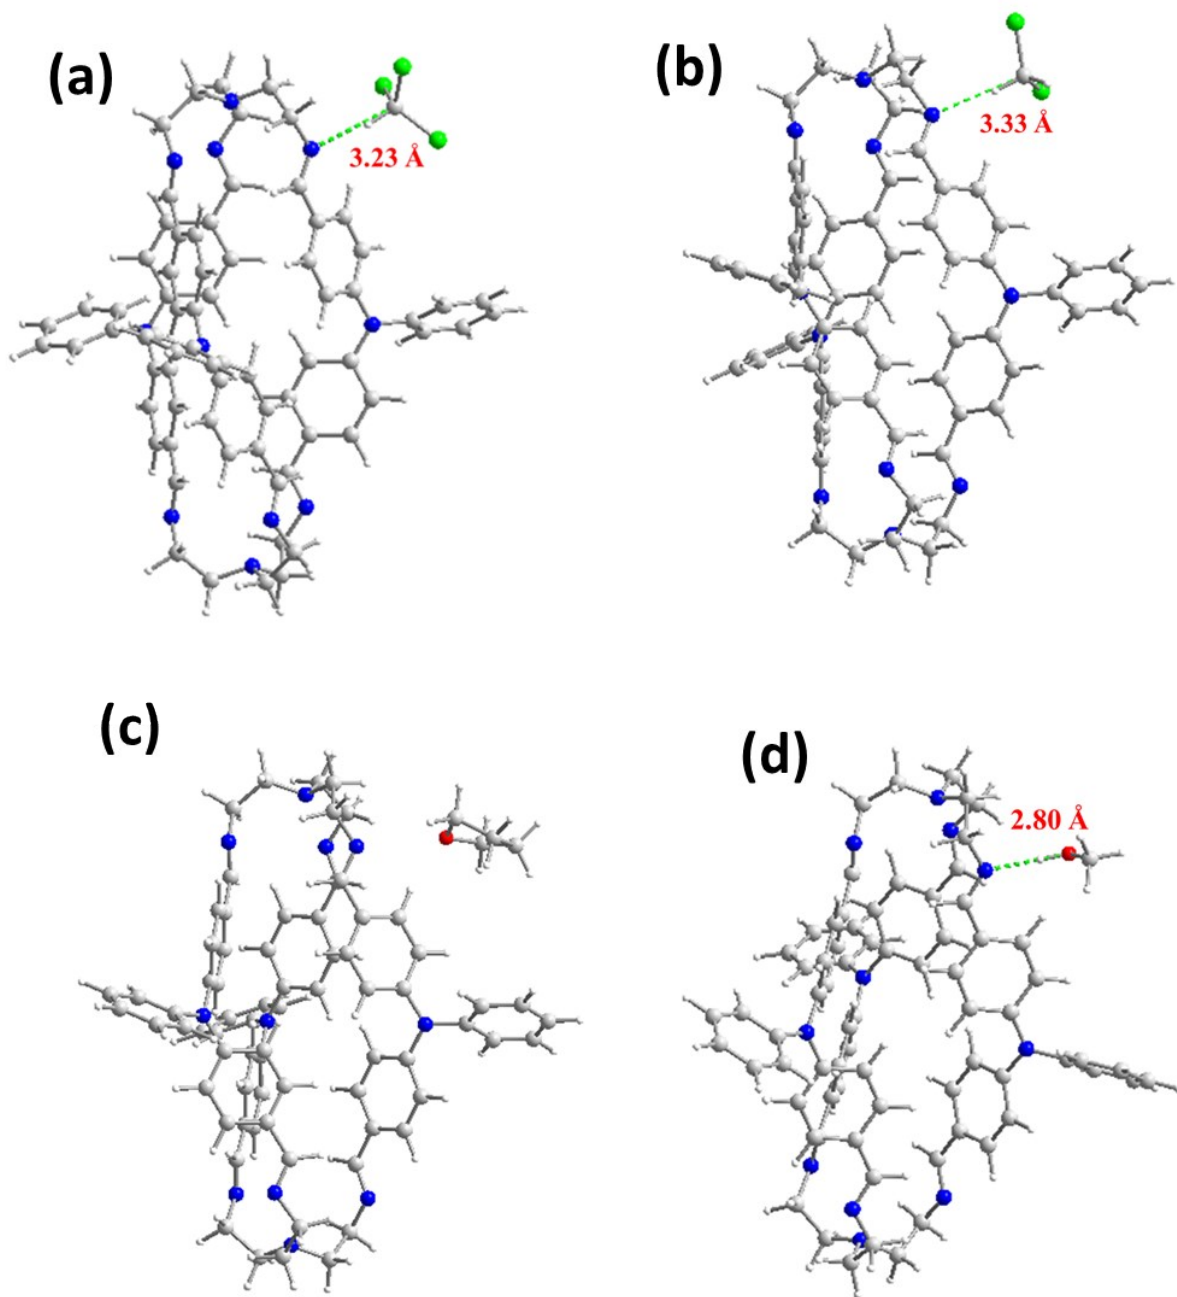

**Fig. S7:** Hydrogen bond lengths observed in the optimized geometries of the F-COC with solvent molecules. (a) CHCl<sub>3</sub> (b) DCM (c) THF (d) MeOH.



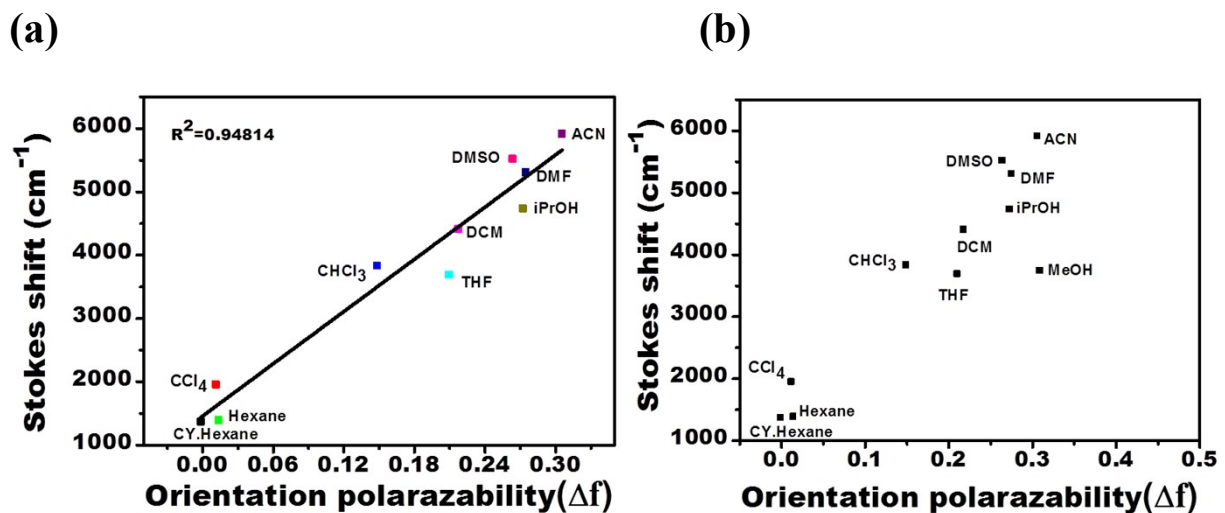

Fig. S8: (a) Lippert-Mataga plot of F-COC with different solvents without Methanol (b) F-COC with methanol.

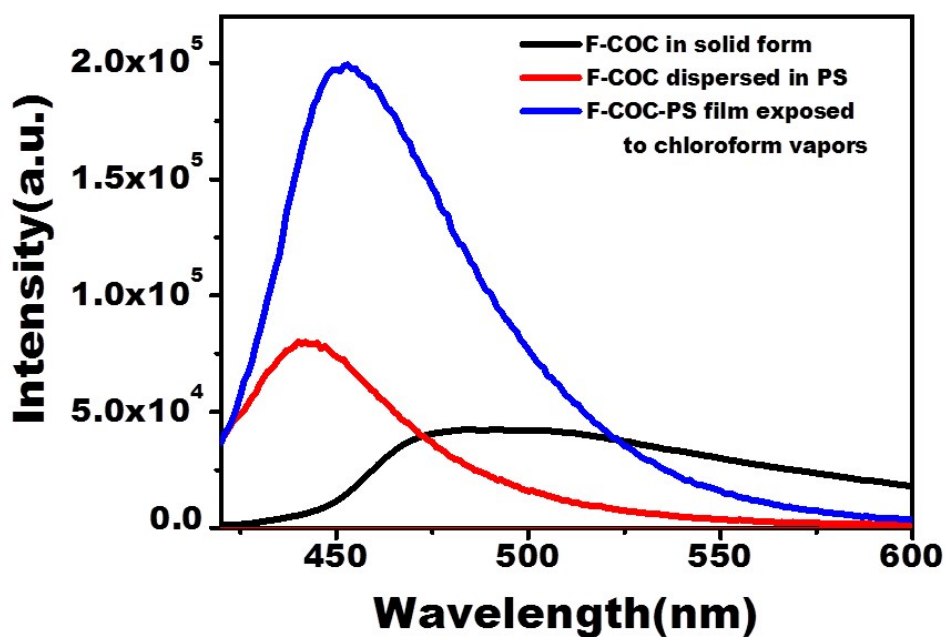

Fig. S9: Fluorescence emission spectrum of solid F-COC and PS polymer matrix with F-COC.

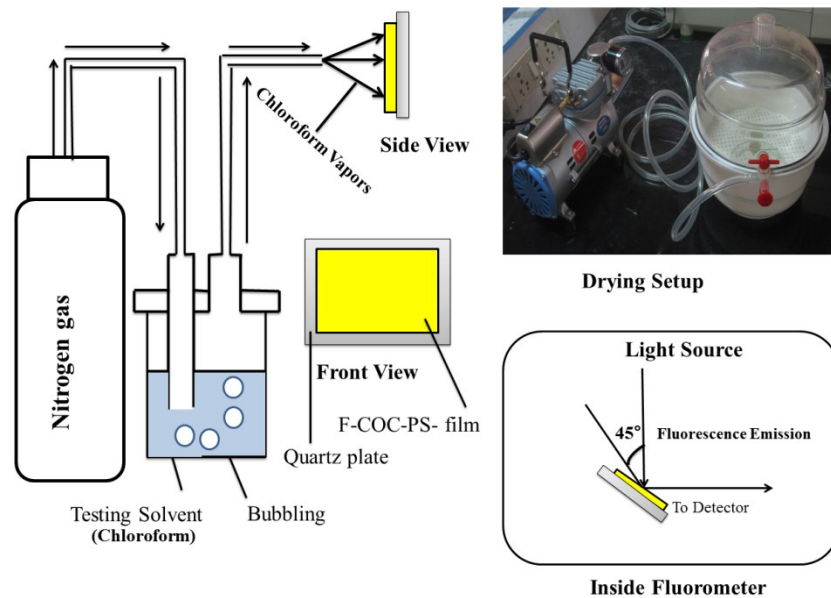

**Fig. S10:** Experimental setup for the chloroform sensor experiment

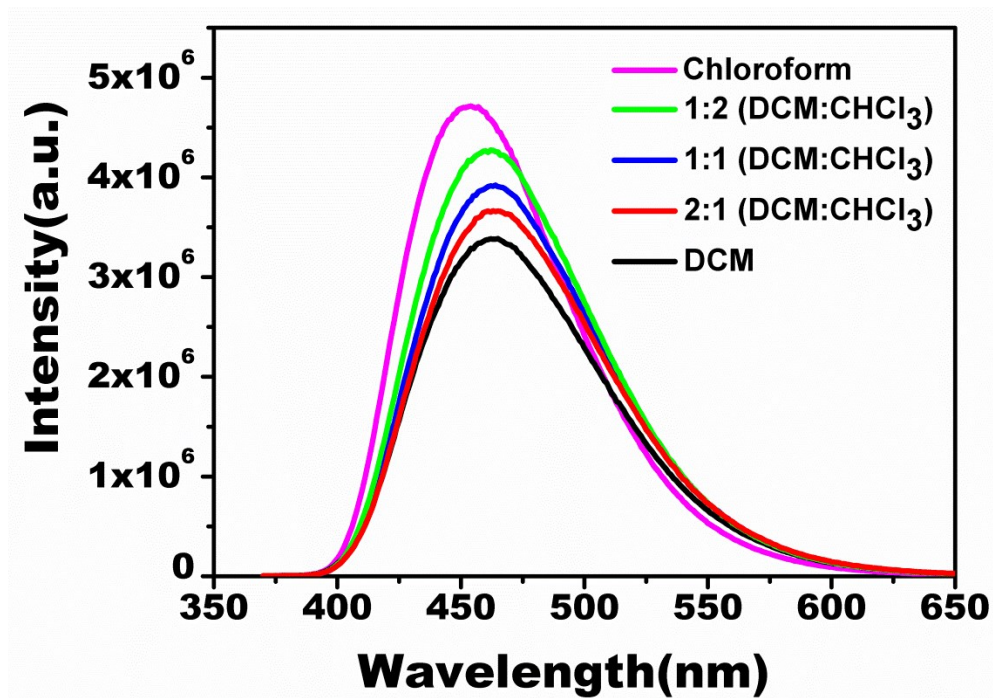

**Fig. S11:** Fluorescence emission spectra of F-COC cage in CHCl<sub>3</sub> and DCM solvent mixture in various ratios.

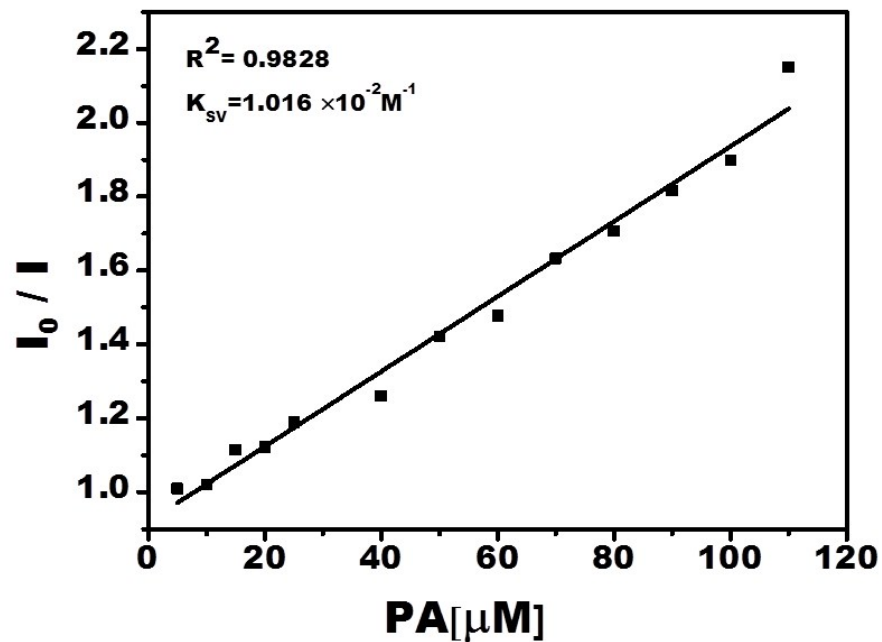

Fig. S12: Stern–Volmer plot  $I_0/I$  versus [PA] in DMSO.

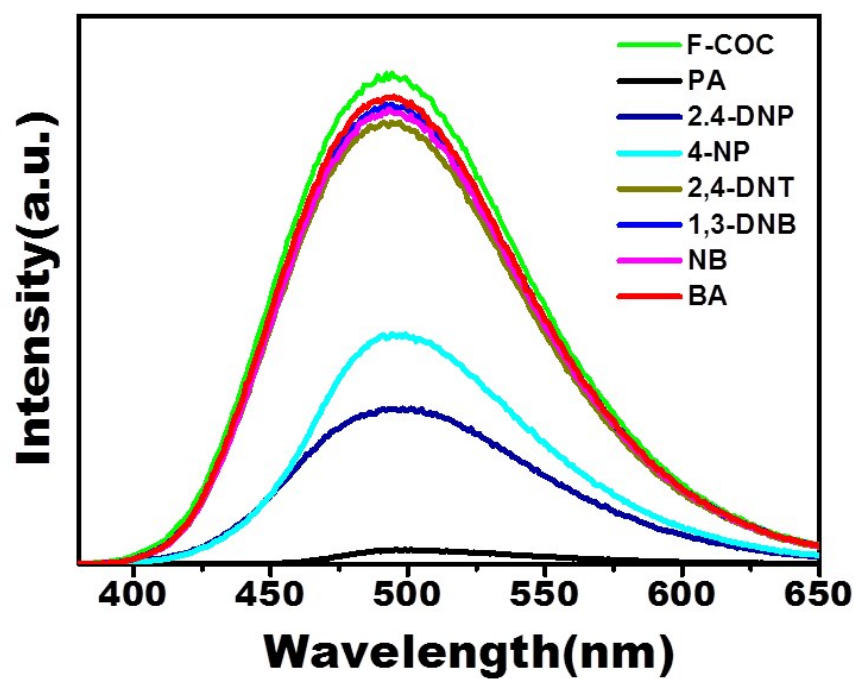

Fig. S13: Fluorescence emission of F-COC with different nitro analytes.

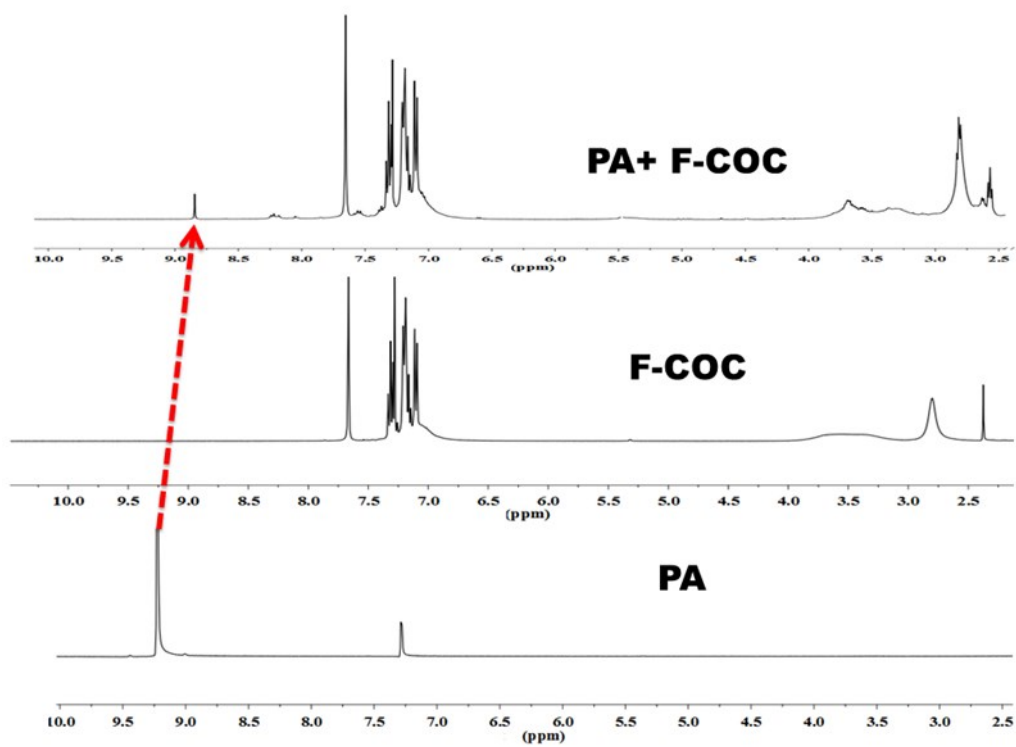

**Fig. S14:** <sup>1</sup>H NMR spectra of F-COC before and after addition of PA recorded in CDCl<sub>3</sub> (Red arrow indicating the change in chemical shift of PA acidic proton towards up field).

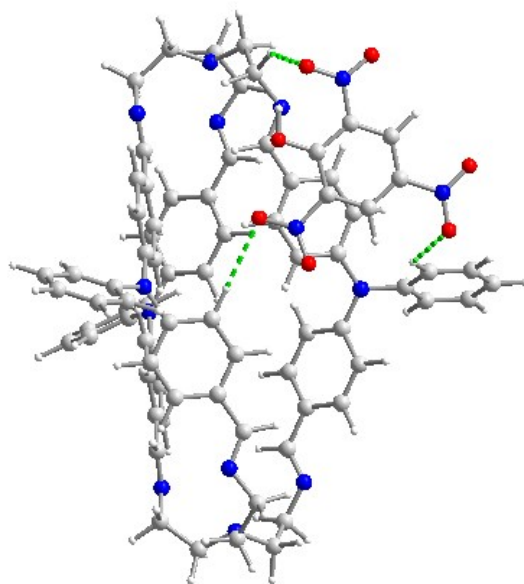

**Fig. S15:** Hydrogen bonding interactions observed in the optimized geometries of the F-COC with PA.

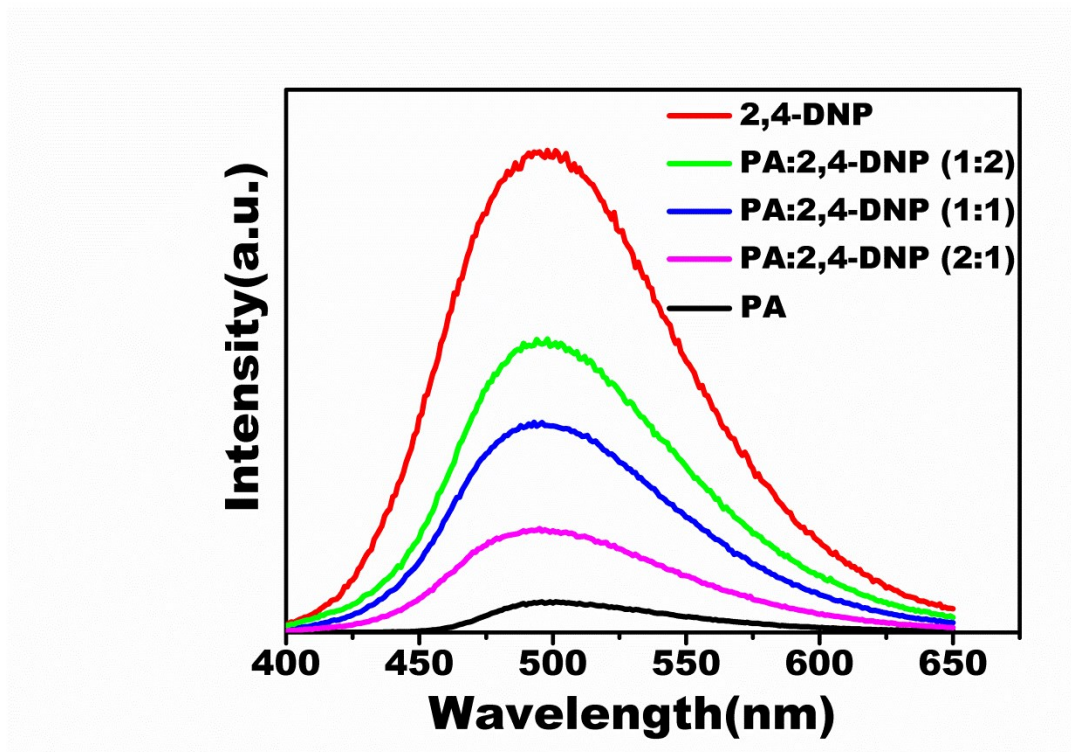

**Fig. S16:** Fluorescence emission plots of F-COC in DMSO solutions of mixture of picric acid and 2,4-DNP in various ratios.

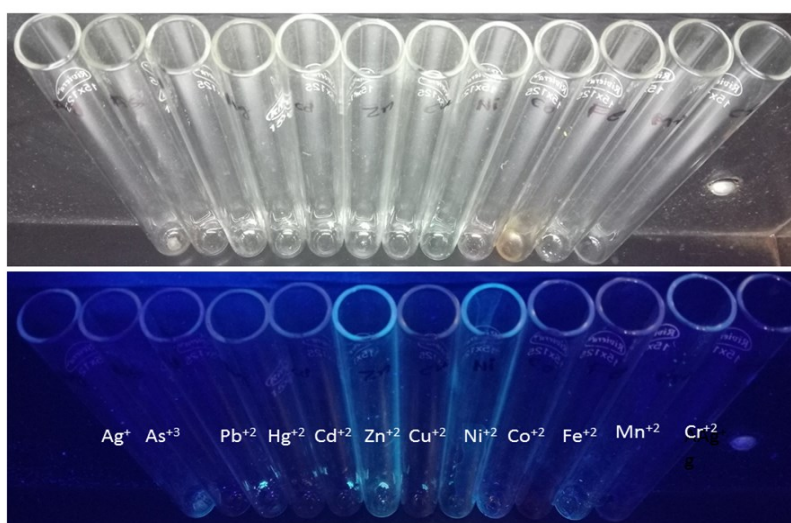

**Fig. S17:** Solid samples of F-COC cage coordination complexes with different metal ions viewing in normal visible light (Top). (b) Under UV light at 365 nm (down).

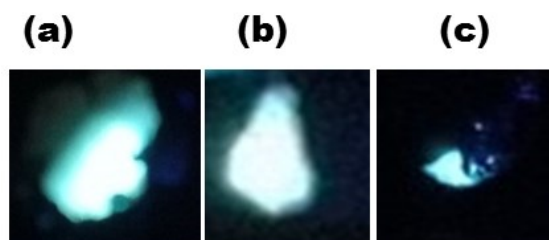

**Fig. S18:** Photographs of (a)  $\text{Zn}^{+2}$  – F-COC (b)  $\text{Cd}^{+2}$  - F-COC (c)  $\text{Pb}^{+2}$  – F-COC coordination complexes in powder form under UV light at 365 nm.

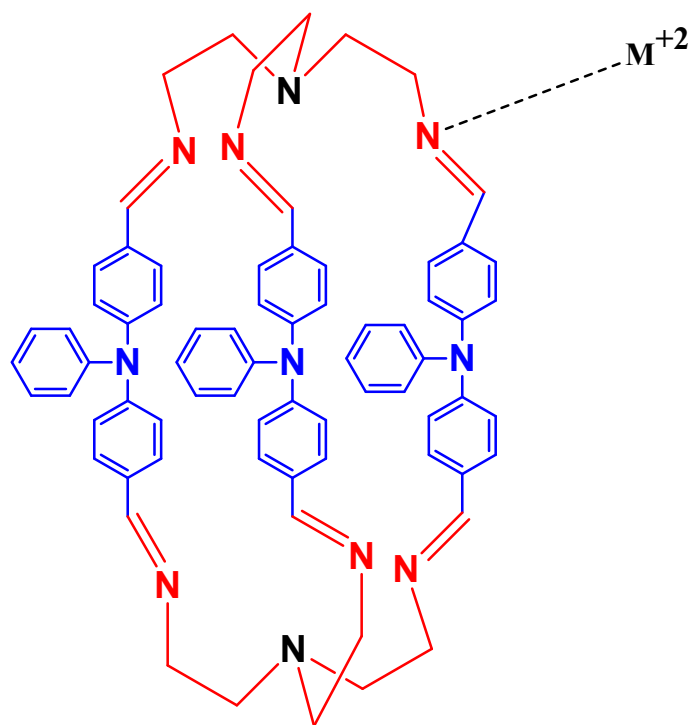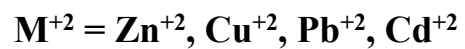

**Fig. 19:** Schematic representation of Coordination mode of F-COC with metal ions.

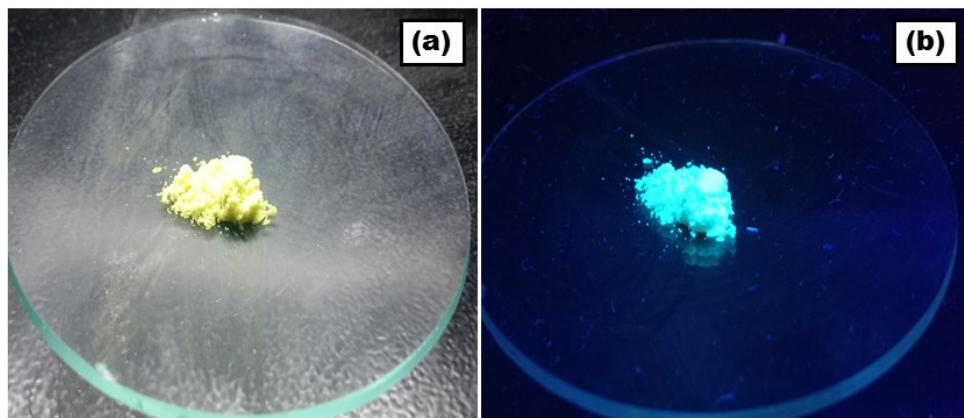

**Fig. S20:** Digital photograph of the solid F-COC in powder form under (a) normal light (b) UV light at 365 nm.

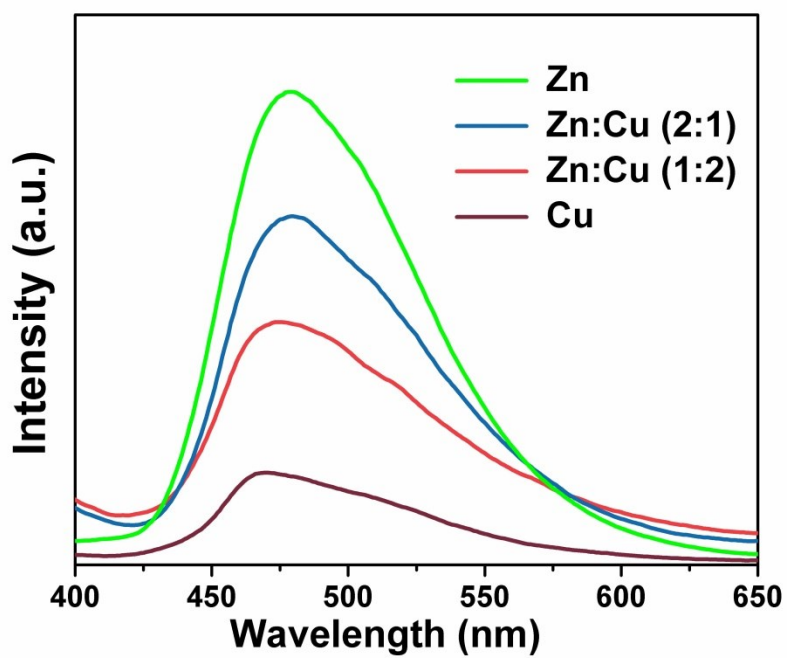

**Fig. S21:** PL emission spectra of F-COC with Zn<sup>2+</sup> and Cu<sup>2+</sup> metal ions in various ratios in solid state.

**Table. S1:** Single crystal data information of F-COC crystal.

|                                                             |                                                 |
|-------------------------------------------------------------|-------------------------------------------------|
| <b>Compound</b>                                             | COC-1                                           |
| <b>Formula</b>                                              | C <sub>77</sub> H <sub>69</sub> N <sub>11</sub> |
| <b>mw [g.mol<sup>-1</sup>]</b>                              | 1148.43                                         |
| <b>space group, Z</b>                                       | <i>P</i> -1, 2                                  |
| <b><i>a</i> (Å)</b>                                         | 13.0867(11)                                     |
| <b><i>b</i> (Å)</b>                                         | 13.5562(13)                                     |
| <b><i>c</i> (Å)</b>                                         | 20.724(2)                                       |
| <b><math>\alpha</math> (°)</b>                              | 87.641(5)                                       |
| <b><math>\beta</math> (°)</b>                               | 83.468(5)                                       |
| <b><math>\gamma</math> (°)</b>                              | 61.366(4)                                       |
| <b><i>V</i> (Å<sup>3</sup>)</b>                             | 3205.5(5)                                       |
| <b>radiation, <math>\lambda</math> (Å)</b>                  | Mo K $\alpha$ , 0.71073                         |
| <b><math>\rho_{\text{calcd}}</math> (g·cm<sup>-3</sup>)</b> | 1.190                                           |
| <b><math>\mu</math> (mm<sup>-1</sup>)</b>                   | 0.071                                           |
| <b>R1/wR2, <sup>a</sup><math>I \geq 2\sigma_I</math></b>    | 0.0845, 0.2002                                  |
| <b>R1/wR2, <sup>a</sup>all data</b>                         | 0.1745, 0.2454                                  |

**Table. S2:** Observed and calculated absorption maxima of high energy absorption band of F-COC observed at around 360 nm.

| S. No. | Solvent Name     | Absorption max. Wavelength ( $\lambda_{\text{max}}$ ) (nm) |            |
|--------|------------------|------------------------------------------------------------|------------|
|        |                  | Observed                                                   | Calculated |
| 1      | hexane           | 326                                                        | 322.3      |
| 2      | cy-hexane        | 326                                                        | 322.6      |
| 3      | CCl <sub>4</sub> | 331                                                        | 322.4      |
| 4      | chloroform       | 332                                                        | 327        |
| 5      | THF              | 328                                                        | 325.8      |
| 6      | DCM              | 332                                                        | 326.1      |
| 7      | iso-proponol     | 328                                                        | 326.8      |
| 8      | methanol         | 328                                                        | 327.1      |
| 9      | DMF              | 328                                                        | 327.3      |
| 10     | acetonitrile     | 325                                                        | 327.4      |
| 11     | DMSO             | 331                                                        | 327.4      |



**Table. S3:** Spectral data of F-COC in various solvents.

| <b>Solvent</b>   | <b>E<sub>T</sub> (30)<br/>(kcal.mol<sup>-1</sup>)</b> | <b>λ<sub>abs</sub> (nm)</b> | <b>λ<sub>em</sub> (nm)</b> | <b>Δ<math>\bar{\nu}</math> (cm<sup>-1</sup>)</b> | <b>Δf (cm<sup>-1</sup>)</b> |
|------------------|-------------------------------------------------------|-----------------------------|----------------------------|--------------------------------------------------|-----------------------------|
| Acetonitrile     | 45.6                                                  | 375                         | 482                        | 5919.8                                           | 0.3054                      |
| Chloroform       | 39.1                                                  | 383                         | 449                        | 3837.9                                           | 0.1482                      |
| CCl <sub>4</sub> | 32.4                                                  | 377                         | 407                        | 1955.2                                           | 0.0112                      |
| Chlorobenzene    | 37.5                                                  | 381                         | 436                        | 3310.9                                           | 0.142                       |
| Cyclohexane      | 30.9                                                  | 372                         | 392                        | 1371.5                                           | -0.0016                     |
| 1,2-DCE          | 41.9                                                  | 381                         | 462                        | 4601.6                                           | 0.2208                      |
| DCM              | 40.7                                                  | 381                         | 458                        | 4412.7                                           | 0.2171                      |
| 1,4-Dioxane      | 36                                                    | 376                         | 431                        | 3393.8                                           | 0.0245                      |
| DMF              | 43.2                                                  | 378                         | 473                        | 5313.4                                           | 0.2743                      |
| DMSO             | 45.1                                                  | 380                         | 481                        | 5525.8                                           | 0.2637                      |
| Hexane           | 31                                                    | 369                         | 389                        | 1393.3                                           | 0.0137                      |
| Methanol         | 55.4                                                  | 376                         | 432                        | 3447.6                                           | 0.3085                      |
| i-PrOH           | 48.4                                                  | 377                         | 459                        | 4738.7                                           | 0.2721                      |
| Nitromethane     | 46.3                                                  | 377                         | 425                        | 2995.7                                           | 0.290                       |
| THF              | 37.4                                                  | 374                         | 434                        | 3696.5                                           | 0.2095                      |
